# Supplementary material for: Efficient Aqueous Copper Removal by Burnt Tire-Derived Carbon-Based Nanostructures and Their Utilization as Catalysts
Source: MDPI journal article supplement (doi:10.3390/min14030302), 2024-03-13
Supplement: s1 [file s1]

# Efficient Aqueous Copper Removal by Burnt Tire-Derived Carbon-Based Nanostructures and Their Utilization as Catalysts

Iviwe Cwaita Arunachellan <sup>1,2</sup>, Madhumita Bhaumik <sup>3</sup>, Hendrik Gideon Brink <sup>3,\*</sup>, Kriveshini Pillay <sup>1</sup>  
and Arjun Maity <sup>2,3,\*</sup>

<sup>1</sup> Department of Chemical Science, University of Johannesburg, Doornfontein, Johannesburg 2028, South Africa; ivienokalipa@gmail.com (I.C.A.); kriveshinip@uj.ac.za (K.P.)

<sup>2</sup> DST/CSIR, Centre for Nanostructure and Advanced Materials (CeNAM), Council for Scientific and Industrial Research (CSIR), 1-Meiring Naude Road, Pretoria 0081, South Africa

<sup>3</sup> Department of Chemical Engineering, Faculty of Engineering, Built Environment and Information Technology, University of Pretoria, Private Bag X20, Pretoria 0028, South Africa; bhaumikmadhu@gmail.com

\* Correspondence: deon.brink@up.ac.za (H.G.B.); amaity@csir.co.za (A.M.);  
Tel.: +27-12-841-2658; Fax: +27-12-841-3553 (A.M.)

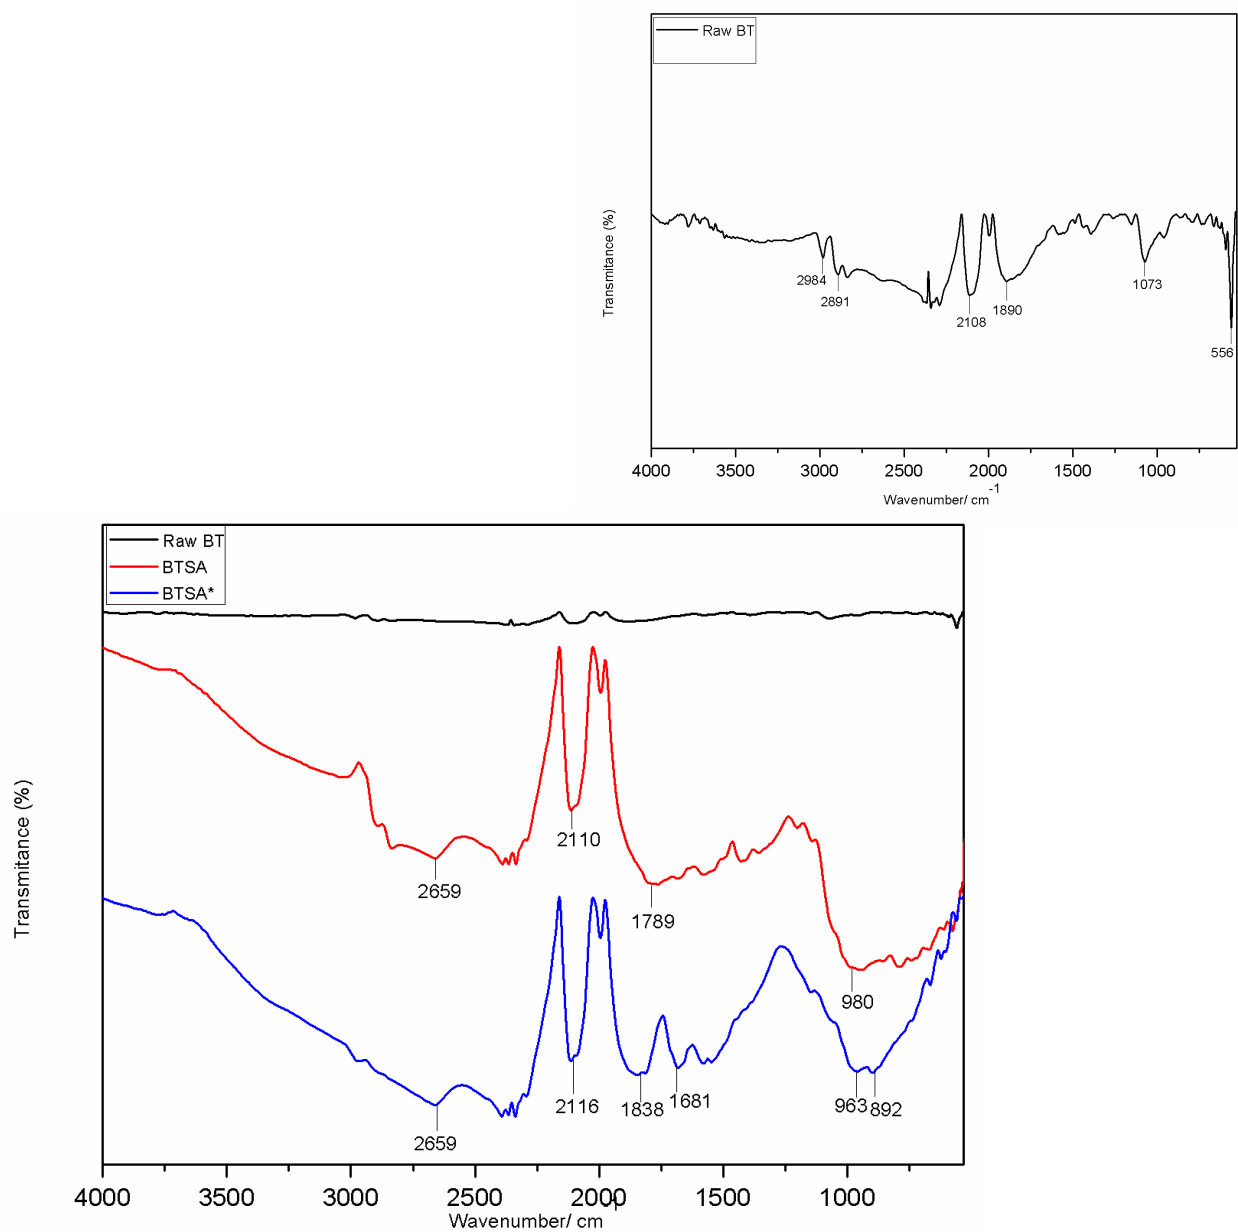

**Figure S1.** FTIR before adsorption for Raw BT, BTSA and, BTHM.

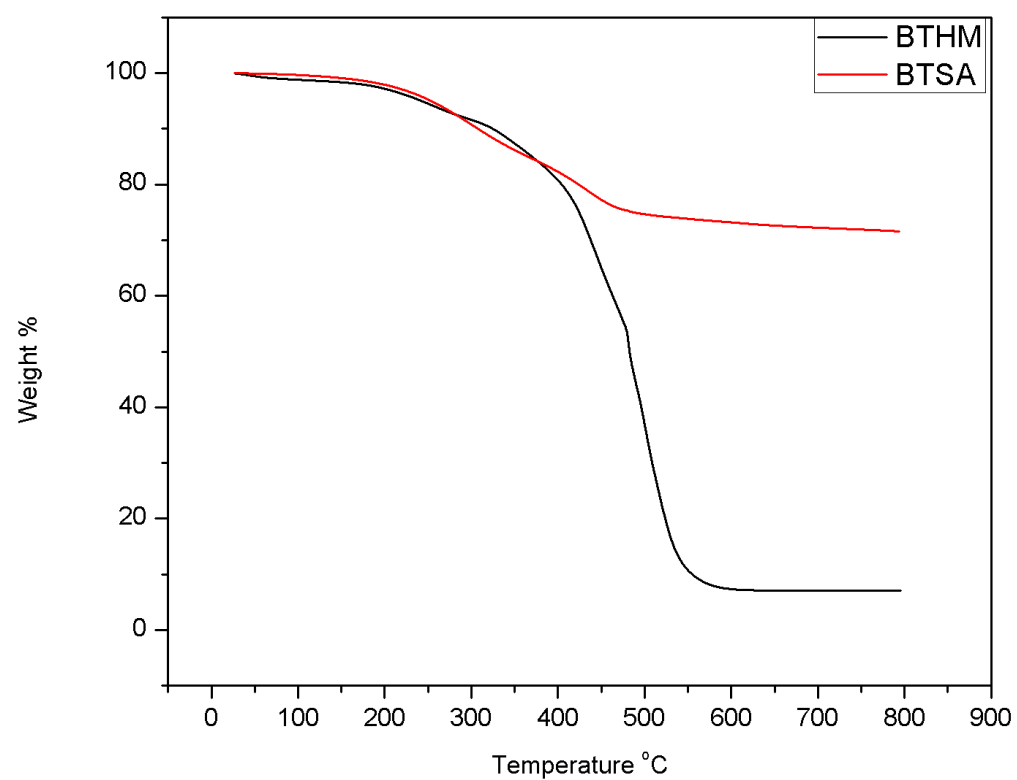

**Figure S2.** Thermogravimetric analysis of BTSA and BTHM.
